# Supplementary material
Source: ML conference proceedings conference paper supplement (https://openreview.net/forum?id=higDU3itix)
Supplement: supplementary_material [file faculty_answers.xlsx]

## Sheet: Sheet1
QNumber	Question	Answer	Marks
1	What is Sufism?	A mystical Islamic tradition emphasizing direct personal experience of God through meditation, devotion, and spiritual practices.	1
2	What made caravans vulnerable during conflicts?	Political instability disrupted trade routes, bandits targeted merchant caravans, warfare blocked safe passages, and lack of centralized protection made long-distance commerce risky and expensive.	3
3	Define 'saranjam'.	Saranjam was a form of land grant resembling military tenure in some Deccan polities, where revenue rights were assigned to service holders in exchange for administrative or military duties.	3
4	How did Bhaktis musicality affect literary form?	The need for musical performance shaped bhakti poetrys meter, repetition and lyricism, favoring refrains, short memorable lines and rhythmic phrasing suitable for communal singing. Poets composed with tuneful cadences that performers could adapt to regional melodies, producing texts that functioned as both literature and song. This musical orientation facilitated oral transmission, improvisation …	5
5	Discuss how Virashaiva communities organized religious life outside orthodox temples.	Virashaiva communities fostered worship through simple shrines, open assemblies and household devotion rather than relying on temple ritual; vachanas encouraged direct speech to the divine and communal ethical codes. They used personal symbols ising the ishtalinga and sang in vernacular, creating local spaces of devotion. Socially, they formed egalitarian networks that emphasized dignity of labou…	5
