# Supplementary material
Source: ML conference proceedings conference paper supplement (https://openreview.net/forum?id=higDU3itix)
Supplement: supplementary_material [file final_scores.xlsx]

## Sheet: Sheet1
Student_ID	Question	Score	Reasoning
S001	What is Sufism?	0.577476	Marks Awarded: 1/1 **Detailed Explanation:** * **Which points the student answered well:** * The student correctly identified Sufism as a "mystical branch of Islam," which aligns perfectly with the reference fact of it being a "mystical islamic tradition." * They accurately described the core focus on "inner spirituality" and a "direct connection with God," which corresponds to the reference fact…
S001	What made caravans vulnerable during conflicts?	0.632917	Marks Awarded: 2/3 **Detailed Explanation** * **Which points the student answered well:** The student correctly identified that traveling "long distances" was a key factor contributing to the vulnerability of caravans. This is a valid and important point, as the reference material notes that the nature of "long-distance commerce" was inherently "risky and expensive." This long-distance travel is …
S001	Define 'saranjam'.	0.842585	Marks Awarded: 2/3 **Detailed Explanation:** * **Which points the student answered well:** * The student correctly identified the fundamental nature of a saranjam as a "type of land grant." * They also correctly identified the recipients of this grant as "soldiers or officials." These two points cover the core of the definition. * **Which points are missing or inadequately explained:** * The stud…
S001	How did Bhakti’s musicality affect literary form?	0.542129	Marks Awarded: 4/10 ### Detailed Explanation **Which points the student answered well:** * The student correctly identified the central element of Bhakti practice mentioned in the question – the use of "music and songs." This is a correct and fundamental starting point for the answer. **Which points are missing or inadequately explained:** * **Lack of Explanation:** The answer is a statement of f…
S001	Discuss how Virashaiva communities organized religious practices.	0.605366	Marks Awarded: 3/10 **Detailed Explanation:** * **Which points the student answered well:** * The student correctly identified two fundamental aspects of Virashaivism: the focus on the worship of Shiva and the practice of wearing a linga. * They also correctly mentioned a key social tenet of the community: the rejection of caste differences. These are important and accurate points. * **Which poin…
