# Supplementary material
Source: ML conference proceedings conference paper supplement (https://openreview.net/forum?id=higDU3itix)
Supplement: supplementary_material [file questions.xlsx]

## Sheet: Sheet1
Question
What is Sufism?
What made caravans vulnerable during conflicts?
Define 'saranjam'.
How did Bhaktis musicality affect literary form?
Discuss how Virashaiva communities organized religious life outside orthodox temples.
