# Supplementary material
Source: ML conference proceedings conference paper supplement (https://openreview.net/forum?id=higDU3itix)
Supplement: supplementary_material [file Student_Answers_Real.xlsx]

## Sheet: Sheet1
StudentID	Question	Answer
S001	What is Sufism?	Sufism is a mystical branch of Islam that focuses on inner spirituality, direct connection with God, and practices like meditation, poetry, and devotion.
S001	What made caravans vulnerable during conflicts?	Caravans were vulnerable because they traveled long distances.
S001	Define 'saranjam'.	Saranjam was a type of land grant given to soldiers or officials, but I am not sure about the exact conditions.
S001	How did Bhakti’s musicality affect literary form?	Bhakti used music and songs.
S001	Discuss how Virashaiva communities organized religious practices.	Virashaiva communities focused on worship of Shiva through personal devotion and wearing of the linga. They also rejected caste differences. But I don’t remember exactly how they organized their religious groups and rituals.
